# Supplementary figures and images for: Chemometric strategies for near infrared hyperspectral imaging analysis: classification of cotton seed genotypes
Source: Royal Society of Chemistry journal article supplement (doi:10.1039/d1ay01076j), 2021-01-01

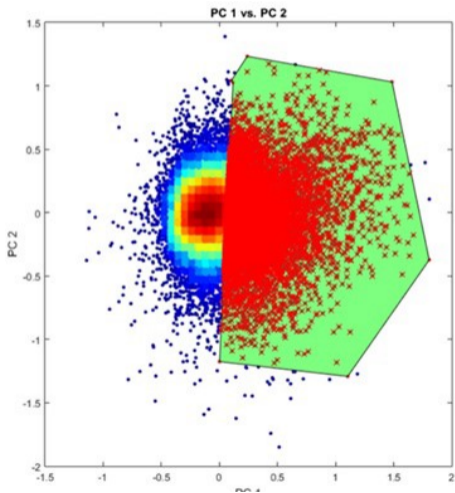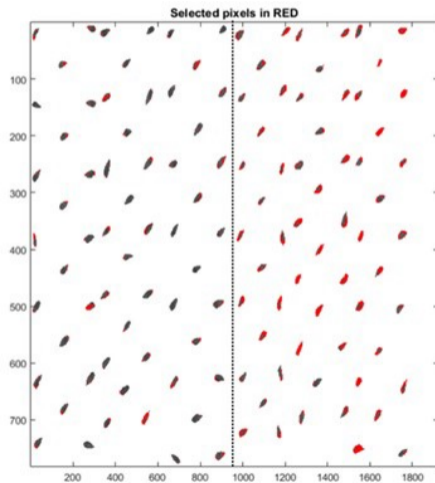

Supplement: d1ay01076j1.pdf [file d1ay01076j1.pdf]

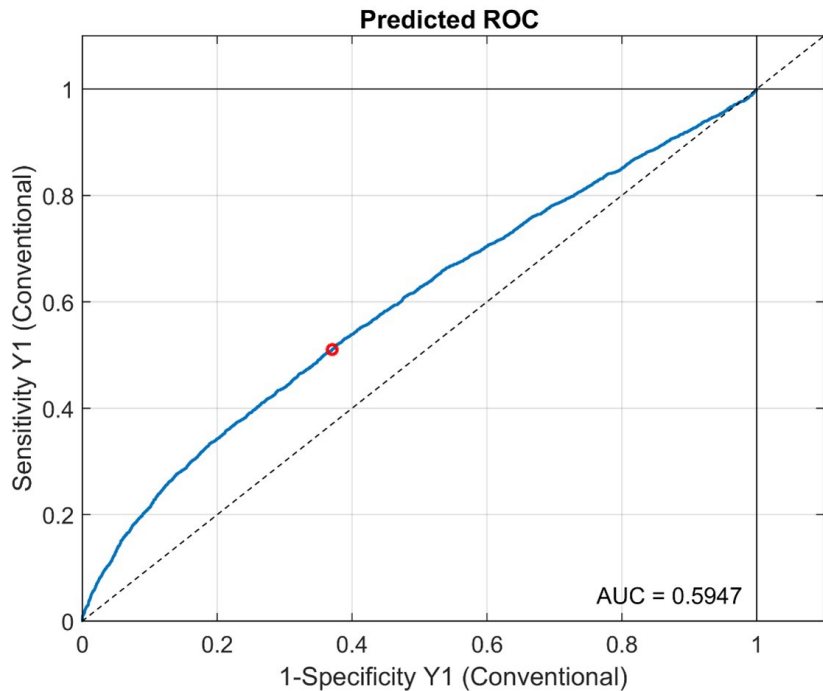

Supplement: d1ay01076j2.pdf [file d1ay01076j2.pdf]
